# Supplementary material
Source: publisher figshare collection journal article supplement (https://frontiersin.figshare.com/ndownloader/files/27243569)

## Supplemental Methods

### RNA sequencing (RNA-Seq)

The ischemic myocardium of rats was quickly dissected and snap-frozen in liquid nitrogen for storage. The sample quality was assessed using an Agilent 2100 Bioanalyzer with a kit (Agilent RNA 6000 Nano Reagents Part 1), and samples with 28S/18S less than 1.0 or RQN (RNA quality number) less than 7.0 were discarded. Total RNA was enriched using magnetic beads with OligodT, and then a single-stranded circular DNA library was prepared for the following RNA-Seq. Briefly, the sequencing reads were mapped to the rat genome (*Rattus\_norvegicus*, UCSC, rn6) using HISAT (Hierarchical Indexing for Spliced Alignment of Transcripts), and reads were also mapped to rat genes using Bowtie2 (version 2.2.5; -q --phred64 --sensitive -dpad 0 --gbar 99999999 --mp 1,1 --np 1 --score-min L,0,-0.1 -p 16 -k 200). To identify the gene expression levels of samples, Bowtie2 was used for mapping, and RSEM (version 1.2.8; default) was used to calculate the expression level. To identify the differential gene expression between groups, the DEGseq2 algorithm was used with the predefined parameters “Fold Change  $\geq 2$  and Adjusted P-value (Q-value)  $\leq 0.001$ ”. The Pheatmap function from the R software package was applied to depict these differentially expressed genes as a heatmap. Gene ontology (GO) enrichment and Kyoto Encyclopedia of Genes and Genomes (KEGG) pathway enrichment were analyzed using the phyper function from the R software package, and the P-value algorithm was given as follows:

$$P = 1 - \sum_{i=0}^{m-1} \frac{\binom{M}{i} \binom{N-M}{n-i}}{\binom{N}{n}}$$

The P-value was adjusted by FDR, and the adjusted P-value was designated as the Q-value. The significance level was set at an FDR  $\leq 0.01$ . More details can be found in supplemental files.

# Supplemental Figures

**Supplementary Figure S1. Cardiac remodeling at the transcriptional level was aggravated by circadian disruption.** Q-values < 0.05. PCA, Principal component analysis; KEGG, Kyoto Encyclopedia of Genes and Genome; GO, Gene Ontology; Q-value, FDR-adjusted P-value; FPKM, fragments per kilobase of transcript per million fragments mapped;  $p^* < 0.05$ ,  $p^{**} < 0.01$ .

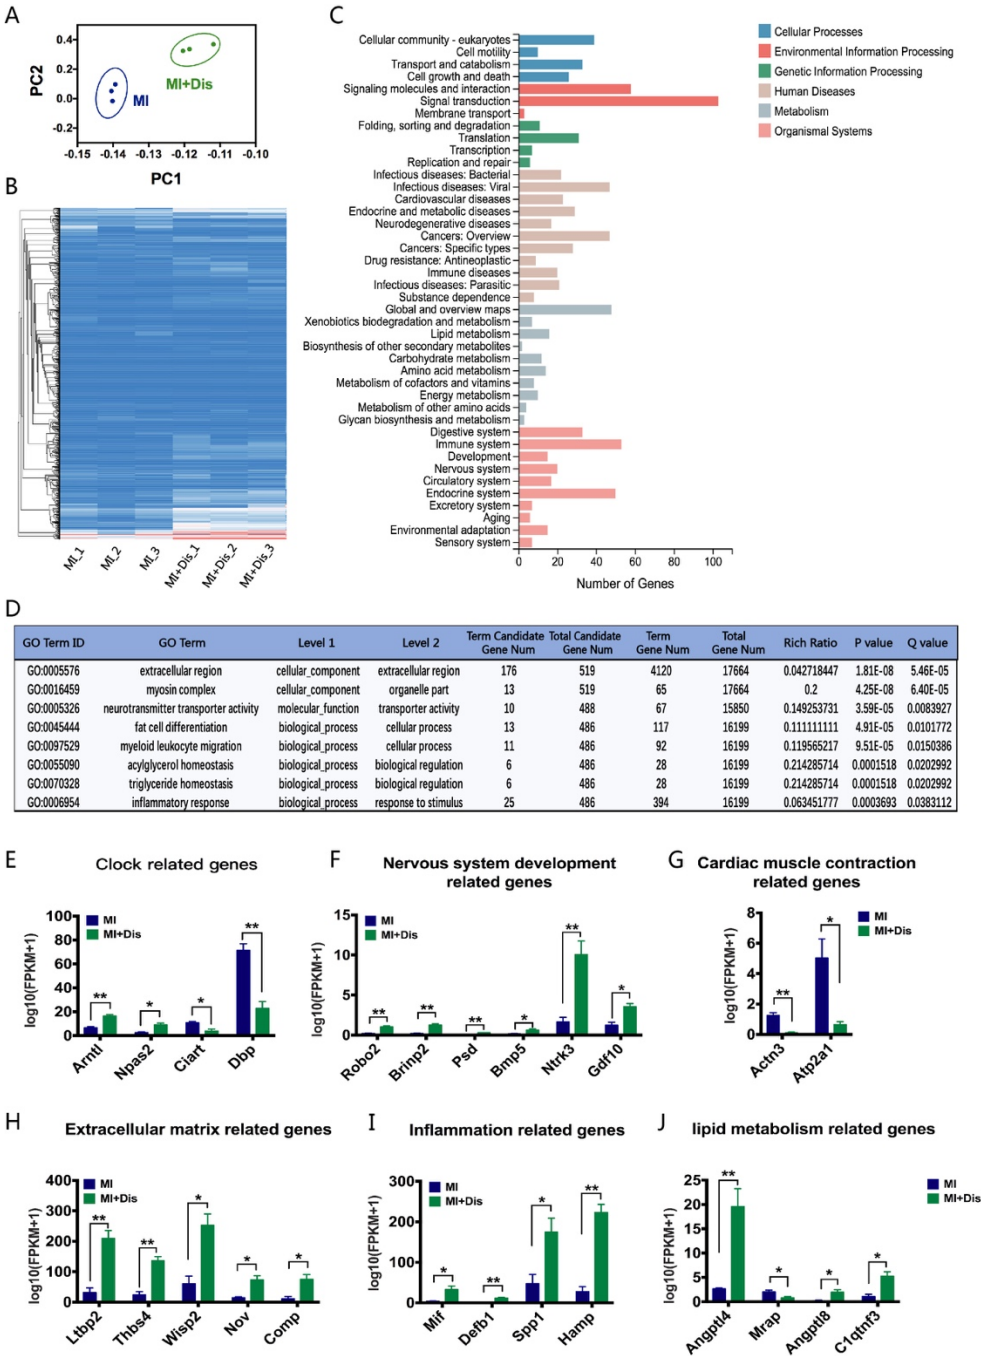

**Supplementary Figure S2. Effects of ganglionic blockade on cardiac remodeling at the transcriptional level.**  $p^* < 0.05$ ,  $p^{**} < 0.01$ ,  $p^{***} < 0.001$ .

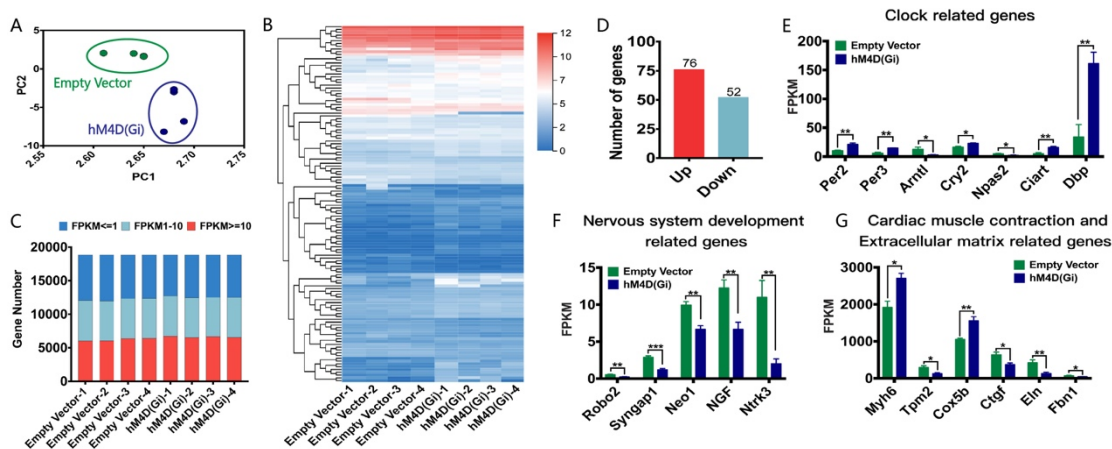

Supplement: Supplementary file [file 27243569]
